# Supplementary material
Source: ML conference proceedings conference paper supplement (https://www.ecva.net/papers/eccv_2020/papers_ECCV/html/123560188_ECCV_2020_paper.php)
Supplement: Supplementary file 2 [file 123560188-supp.zip]

Archive with 2 entries (2 files):
- 1303-supmat/eccv2020_supmat_cameraready.pdf
- 1303-supmat/who_left_dogs_out_supmat.mp4
